# Supplementary material for: Lactobacillus rhamnosus GG improves cognitive impairments in mice with sepsis
Source: PeerJ. 2024 May 28;12:e17427. doi: 10.7717/peerj.17427 (PMC11141560; doi:10.7717/peerj.17427)
Supplement: Supplemental Information 1 — The raw data shows that LGG supplementation mitigates sepsis-related cognitive impairment in mice by preserving BDNF expression and p-TrkB levels in the hippocampus. [file peerj-12-17427-s001.xlsx]

## Sheet: LGG total distance
OFT	Sham								CLP								CLP+LGG
Baseline	3447.42	3548.09	3594.5	3974.82	3381.76	3155.56	3216.73	3173.75	3573.6	3159.53	4140.3	3492.64	3504.55	3525.38	2946.46	3154.86	3047.42	3448.02	3544.21	4074.82	3181.76	3955.56	2943.65	3158.53
7d	4369.2	2957.39	3275.85	3582.75	3856.6	3957.24	2908.42	2873.15	3691.29	3628.25	3908.35	2820.46	3638.75	3402.23	2105.46	2552.73	3515.59	3217.58	2842.47	3791.74	2913.5	3973.27	3435.53	3094.46
14d	3186.04	3310.05	3879	2811.14	3994.19	3272.82	3683.25	2935	3391.57	3638.26	3534.62	3710.71	3036.57	3135.47	3044.83	2846.27	3715.18	2856.17	3152.58	2974.59	3284.16	3153.61	3256.75	3895.63
21d	2848.93	3554.98	3333.83	3729.59	3925.86	3659.58	3025.53	2735.53	3179.12	2892.53	3869.32	3059.6	2973.69	3272.43	2836.25	3683.58	3532.47	2942.47	3638.24	2995.35	3852.32	3044.07	3602.43	3248.23

## Sheet: LGG distance in inner area(cm)
OFT	Sham								CLP								CLP+LGG
Baseline	424.36	425.26	437.66	569.37	574.72	436.79	673.24	531.49	546.04	410.45	459.39	469.29	539.49	417.3	425.25	482.57	524.34	635.42	323.45	432.52	474.13	362.52	223.53	478.43
7d	519.54	493.75	573.29	491.4	691.5	379.53	524.56	582.53	149.5	363.15	433.96	288.98	318.33	249.15	274.57	211.52	368.45	538.42	295.53	294.23	422.46	175.21	275.35	425.46
14d	565.26	615.31	352.52	674.53	417.97	549.16	531.45	591.47	320.24	452.42	352.69	481.27	112.7	384.47	326.47	284.51	539.49	480.18	340.64	396	537.3	633.5	493.56	414.34
21d	481.49	604.32	446.42	471.42	672.89	528.53	523.53	573.56	380.14	417.29	440.58	285.5	301.67	258.48	274.95	214.56	378.36	427.76	487.44	325.86	485.24	586.43	532.87	491.52

## Sheet: LGG time in  inner area(s)
OFT	Sham								CLP								CLP+LGG
Baseline	37.53	44	43.73	63.2	54.87	58.47	37.45	43.67	46.6	36.87	45.67	47.93	52.93	38.07	42.53	48.42	43.34	52.13	47.24	54.24	49.24	62.64	53.54	58.32
7d	42.93	61.6	48.57	53.52	67.42	47.13	47.24	36.85	35.93	52.47	30.33	42.93	28.27	15.4	19.43	25.42	35.24	35.53	40.42	42.52	28.53	31.34	36.64	27.53
14d	63.5	59.25	40.79	62.57	63.13	48.58	46.79	51.43	49.33	25.13	37.71	15.93	28.53	32.67	23.56	41.3	51.53	23.2	37.65	57.85	39.93	61.4	46.76	52.43
21d	49.24	64.27	51.3	47.26	53.59	58.27	42.64	52.74	36.59	47.29	28.12	37.21	41.29	33.61	35.35	29.63	38.65	43.65	52.65	47.25	52.6	50.38	63.54	48.53

## Sheet: LGG Time with novel object(s)
NORT	Sham								CLP								CLP+LGG
Baseline	62.32	49.83	68.81	30.77	53	40.64	52.57	48.35	72.4	67.25	63.39	49.3	50.4	39.23	46.37	52.47	65.34	34.13	48.24	39.63	57.35	49.14	39.45	29.53
7d	42.42	33.24	58.5	62.53	48.52	51.65	37.67	54.86	39.2	23.14	28.42	19.42	14.64	25.2	25.84	11.48	20.4	27.53	18.42	38.53	27.53	31.31	23.83	28.54
14d	68.52	33.85	57.32	36.51	38.64	69.43	47.73	56.48	20.56	17.53	24.53	29.54	43.64	30.54	19.55	18.48	37.23	32.93	48.73	38.13	50.34	29.24	31.34	29.42
21d	47.67	38.53	54.65	64.21	35.54	72.53	45.35	52.56	38.53	17.25	28.14	19.8	21.32	31.56	25.38	33.64	38.29	27.03	40.39	43.69	38.5	49.39	42.29	29.39

## Sheet: LGG Preference index
NORT	Sham								CLP								CLP+LGG
Baseline	0.600384	0.979833	0.55279	0.682827	0.809087	0.821699	0.536536	0.632545	0.814706	0.700765	0.8186	0.808824	0.927199	0.826493	0.643566	0.752356	0.747653	0.820726	0.649757	0.851006	0.617602	0.721931	0.784245	0.682945
7d	0.814706	0.700765	0.6186	0.917237	0.815418	0.715372	0.632463	0.53325	0.54561	0.427199	0.360207	0.535135	0.488324	0.682586	0.536776	0.477524	0.538279	0.648342	0.584539	0.412938	0.587414	0.532982	0.452465	0.572313
14d	0.600384	0.979833	0.55279	0.682827	0.809087	0.821699	0.723554	0.842463	0.54561	0.372936	0.676021	0.535135	0.488324	0.612586	0.356754	0.467635	0.51833	0.712865	0.612736	0.572835	0.678235	0.629734	0.523472	0.692373
21d	0.729497	0.627175	0.517473	0.682309	0.871264	0.513122	0.729346	0.845623	0.518824	0.479393	0.602882	0.300438	0.428047	0.462978	0.532358	0.425755	0.493275	0.752367	0.587523	0.732905	0.620524	0.520627	0.739533	0.629406

## Sheet: HP DG viable neurons
	Nissl
	Sham	CLP	CLP+LGG
	250	244	298
	265	239	237
	321	219	289
	375	244	329
	318	275	273
	274	294	281

## Sheet: HP CA1 viable neuron
	Nissl
	Sham	CLP	CLP+LGG
	78	56	67
	76	49	73
	69	67	60
	94	58	80
	84	48	75
	64	54	73

## Sheet: HP CA3 viable neuron
	Nissl
	Sham	CLP	CLP+LGG
	255	71	178
	237	82	230
	179	135	183
	193	127	152
	219	83	169
	205	96	173

## Sheet: IF CA1-BDNF
	Percentage of area with positive BDNF staining (20x)
	Sham	CLP	CLP+LGG
	5.499	0.373	3.249
	4.924	1.38	3.926
	5.036	2.593	3.28
	4.286	2.403	4.294
	4.835	3.014	3.502
	5.829	2.405	2.098

## Sheet: IF CA1-NeuN
	NeuN+ cells number/area(20x)
	Sham	CLP	CLP+LGG
	156	120	142
	159	118	139
	162	123	148
	147	108	142
	153	113	152
	142	126	159

[truncated: 8 more sheets: IF DG-BDNF, IF DG-NeuN, IHC CA1 positive cell（%）, IHC CA3 positive cell（%）, IHC DG positive cell（%）, Survival (%), BDNF_β-actin, P-TrkB_TrkB]
